# Supplementary material for: Adsorption under nanoconfinement: a theoretical–computational study revealing significant enhancement beyond the Langmuirian levels
Source: Royal Society of Chemistry journal article supplement (doi:10.1039/d0cp03415k), 2020-01-01
Supplement: d0cp03415k1.pdf [file d0cp03415k1.pdf]

ARTICLE

## Adsorption under nanoconfinement: A theoretical-computational study revealing significant enhancement beyond the Langmuirian levels

Received 00th January 20xx,  
Accepted 00th January 20xx

Micha Polak,<sup>\*a</sup> and Leonid Rubinchov<sup>a</sup>

DOI: 10.1039/x0xx00000x

### Supplementary Information (ESI)

#### Statistical-mechanical derivations

1. The case of  $n$  adsorbed molecules (one adsorbed molecule per surface site)

Considering equilibrium adsorption of an ideal gas in a closed “stoichiometric” nanosystem including overall  $n$  molecules capable to be adsorbed on a set of  $n$  sites, the canonical partition function is given by,

$$Q_n = \sum_{l=0}^n \frac{(nv^{pre}/\Lambda^3)^{n-l}}{(n-l)!} \frac{n!}{l!(n-l)!} z^l, \quad (S1)$$

where  $v^{pre}$  is the preadsorption volume per molecule,  $\Lambda = \left(\frac{h^2}{2\pi mkT}\right)^{\frac{1}{2}}$  denotes the thermal de Broglie wavelength, and  $z \equiv \exp(-\beta E_{ads})$ . The average coverage and pressure are given by,

$$\theta_n = \frac{1}{Q_n} \sum_{l=0}^n \frac{l}{n} \frac{(nv^{pre}/\Lambda^3)^{n-l}}{(n-l)!} \frac{n!}{l!(n-l)!} z^l, \quad (S2)$$

and

$$p_n = p^{pre}(1 - \theta_n), \quad (S3)$$

respectively, where  $p^{pre} = kT/v^{pre}$ .

2. Multiple adsorbed molecules per surface site

Considering a closed “stoichiometric” nanosystem that comprises  $k$  distinguishable adsorption sites capable of binding up to  $s$  molecules per site (maximum  $n = ks$  molecules), the canonical partition function is given by,

$$Q_n^{(s)} = \sum_{l=0}^n \frac{(nv^{pre}/\Lambda^3)^{n-l}}{(n-l)!} g(l, k, s) z^l, \quad (S4)$$

where the number of distributions of  $l$  molecules on  $k$  sites is given by the sum<sup>1</sup>,

$$g(l, k, s) = \sum_{j=0}^k (-1)^j \binom{k}{j} \binom{k+l-j(s+1)-1}{k-1}. \quad (S5)$$

The average coverage and pressure read,

$$\theta_n^{(s)} = \frac{1}{Q_n} \sum_{l=0}^n \frac{l}{k} \frac{(nv^{pre}/\Lambda^3)^{n-l}}{(n-l)!} g(l, k, s) z^l, \quad (S6)$$

and

$$p_n^{(s)} = \frac{1}{Q_n} \sum_{l=0}^n (n-l) \frac{kT}{nv^{pre}} \frac{(nv^{pre}/\Lambda^3)^{n-l}}{(n-l)!} g(l, k, s) z^l. \quad (S7)$$

In the thermodynamic limit, the grand canonical partition function for adsorption site in contact with a macroscopic reservoir of ideal gas having chemical potential  $\mu = kT \ln \frac{p\Lambda^3}{kT}$  (determined by pressure and temperature) is,

$$\Xi = \sum_{i=0}^s q^i = \frac{1-q^{s+1}}{1-q}, \quad (S8)$$

where

$$q \equiv \exp[-\beta(E_{ads} - \mu)] = z \frac{p\Lambda^3}{kT} = pK_L. \quad (S9)$$

Correspondingly, the generalized adsorption isotherm is given by,

$$\theta = \frac{\partial \ln \Xi}{\partial (\beta\mu)} = \frac{q+(sq-s-1)q^{s+1}}{(1-q)(1-q^{s+1})} = \frac{pK_L+(spK_L-s-1)(pK_L)^{s+1}}{(1-pK_L)[1-(pK_L)^{s+1}]}, \quad (S10)$$

For the case  $s = 1$  it coincides with the Langmuir isotherm.

<sup>a</sup> Department of Chemistry, Ben-Gurion University of the Negev, Beer-Sheva 84105, Israel

The differential-equation method: Analytical solution and limiting cases

$$\theta_n \approx p^{pre} K_L, \quad (S19)$$

As derived elsewhere<sup>2</sup>, the adsorption equilibrium is described by the differential equation,

$$\frac{1}{n} \frac{\partial \theta_n}{\partial \ln K_L} = \frac{\theta_n}{p^{pre} K_L} - (1 - \theta_n)^2. \quad (S11)$$

Its analytical solution gives the coverage,

$$\theta_n = 2 + \frac{1}{p^{pre} K_L} + \frac{1}{n} \left[ 1 - (n+1) \frac{L_{N+1}\left(-\frac{n}{p^{pre} K_L}\right)}{L_N\left(-\frac{n}{p^{pre} K_L}\right)} \right], \quad (S12)$$

with  $L_n(x)$  denoting the Laguerre polynomial<sup>3</sup>. An explicit expression of the power-series expansion for the Laguerre polynomials is given by<sup>3</sup>,

$$L_n(x) = (-1)^{-n} \left[ \frac{x^n}{n!} - \frac{nx^{n-1}}{1!(n-1)!} + \frac{n(n-1)x^{n-2}}{2!(n-2)!} - \dots - (-1)^n nx + (-1)^n \right], \quad (S13)$$

where  $x \equiv -\frac{n}{p^{pre} K_L}$  in the present case.

1) When  $v^{pre}$  is small, then  $p^{pre} K_L$  is large,  $x$  is small and its higher powers can be neglected,

$$L_n(x) \approx (-1)^{-n} [ -(-1)^n nx + (-1)^n ]. \quad (S14)$$

Correspondingly,

$$\frac{L_{n+1}(x)}{L_n(x)} \approx \frac{(-1)^{-n-1} [ -(-1)^{n+1} (n+1)x + (-1)^{n+1} + \dots ]}{(-1)^{-n} [ -(-1)^n nx + (-1)^n + \dots ]} = 1 - x. \quad (S15)$$

Therefore,

$$\theta_n \approx 1 - \frac{n}{p^{pre} K_L}, \quad (S16)$$

for the present case of large  $p^{pre} K_L$ , namely, the adsorption is close to completion. Furthermore, since  $p_n = p^{pre} (1 - \theta_n)$  the pressure reaches a finite cut-off value  $p_n^{max} = \frac{n}{K_L}$  (Fig. S1, see also Fig. 1a).

2) When  $v^{pre}$  is large, then  $p^{pre} K_L$  is small,  $x$  is largely negative, and its lower powers can be neglected, so

$$L_n(x) \approx (-1)^{-n} \frac{x^n}{n!} \left[ 1 - \frac{n^2}{x} + \frac{n^2(n-1)^2}{2x^2} \right]. \quad (S17)$$

Correspondingly,

$$\frac{L_{n+1}(x)}{L_n(x)} \approx \frac{(-1)^{-n-1} \frac{x^{n+1}}{(n+1)!} \left[ 1 - \frac{(n+1)^2}{x} + \frac{n^2(n+1)^2}{2x^2} \right]}{(-1)^{-n} \frac{x^n}{n!} \left[ 1 - \frac{n^2}{x} + \frac{n^2(n-1)^2}{2x^2} \right]} = -\frac{x}{n+1} \left( 1 - (2n+1) \frac{1}{x} - n^2 \frac{1}{x^2} \right), \quad (S18)$$

and

i.e., the coverage does not depend on the number of molecules and the NCEEA effect vanishes.

## References

1. C. A. Charalambides, *Enumerative combinatorics*, Chapman & Hall/CRC, New York, 2002.
2. L. Rubinovich and M. Polak, arXiv:2004.00651. 2020.
3. K. B. Oldham, J. C. Myland and J. Spanier, *An atlas of functions*, Springer Science+Business Media New York, 2009.

## ARTICLE

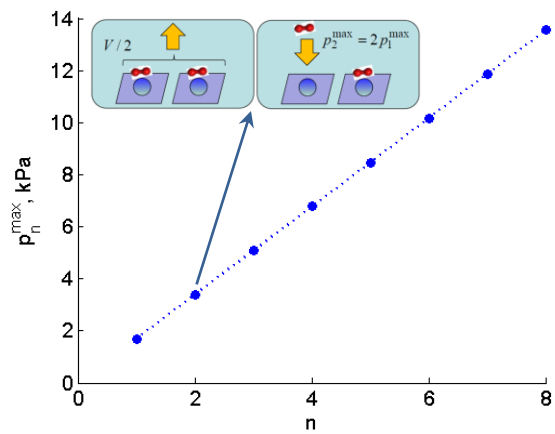

**Fig. S1** The cut-off (maximal) pressure increases linearly with system size. Insets: compared to the smallest 1-molecule system (Fig.1a), desorption from the twice larger number of sites in the 2-molecule system is counterbalanced by a twice higher pressure.
